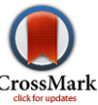

## Correction

# Correction: Progressive Accumulation of Activated ERK2 within Highly Stable ORF45-Containing Nuclear Complexes Promotes Lytic Gammaherpesvirus Infection

## The *PLOS Pathogens* Staff

Some of the author contributions for Melissa S. Anderson were omitted. The following are the correct author contributions for this paper:

Conceived and designed the experiments: ENW DHK.  
Performed the experiments: ENW MSA MSL. Analyzed the data: ENW MSA DHK. Contributed reagents/materials/analysis tools: MSA. Wrote the paper: ENW DHK

## Reference

1. Woodson EN, Anderson MS, Loftus MS, Kedes DH (2014) Progressive Accumulation of Activated ERK2 within Highly Stable ORF45-Containing Nuclear Complexes Promotes Lytic Gammaherpesvirus Infection. *PLoS Pathog* 10(4): e1004066. doi:10.1371/journal.ppat.1004066

**Citation:** The *PLOS Pathogens* Staff (2014) Correction: Progressive Accumulation of Activated ERK2 within Highly Stable ORF45-Containing Nuclear Complexes Promotes Lytic Gammaherpesvirus Infection. *PLoS Pathog* 10(4): e1004147. doi:10.1371/journal.ppat.1004147

**Published:** April 28, 2014

**Copyright:** © 2014 The *PLOS Pathogens* Staff. This is an open-access article distributed under the terms of the Creative Commons Attribution License, which permits unrestricted use, distribution, and reproduction in any medium, provided the original author and source are credited.
